# Supplementary material for: New type of tin(iv) complex based turn-on fluorescent chemosensor for fluoride ion recognition: elucidating the effect of molecular structure on sensing property
Source: Royal Society of Chemistry journal article supplement (doi:10.1039/d4dt00461b), 2024-01-01
Supplement: d4dt00461b1.pdf [file d4dt00461b1.pdf]

Supporting information

**New Type of Tin(IV) complex based Turn-on Fluorescent Chemosensor for Fluoride ion Recognition: Elucidating the Effect of Molecular Structure on Sensing Property**

*Andrew Wu,<sup>1</sup> Patrick C. Hillesheim,<sup>2</sup> Peter N. Nelson,<sup>3</sup> Matthias Zeller,<sup>4</sup> Gia Carignan,<sup>5</sup> Jing Li,<sup>5</sup> and Daniel W. Ki,<sup>1\*</sup>*

<sup>1</sup>School of Natural Sciences and Mathematics, Stockton University, New Jersey, 08205, United States

<sup>2</sup>Department of Chemistry and Physics, Ave Maria University, Ave Maria, Florida, 34142, United States

<sup>3</sup>Department of Chemistry, The University of the West Indies Mona, Jamaica

<sup>4</sup>Department of Chemistry, Purdue University, West Lafayette, Indiana, 47907, United States

<sup>5</sup>Department of Chemistry and Chemical Biology, Rutgers University, Piscataway, New Jersey 08854, United States

Email: [Daniel.Ki@stockton.edu](mailto:Daniel.Ki@stockton.edu)

Table of Contents

Figure S1. Experimentally collected and the simulated PXRD for compounds **1-3**

Table S1. Crystallographic details and information for compounds **2** and **3**

Figure S2. Depictions of the hydrogen interactions with the halide moieties within complexes

Figure S3. Depictions of the  $\pi$  stacking interactions with the halide moieties within complexes

Figure S4. Calculated MO surfaces for complex **2** (a) and complex **3** (b)

Figure S5. FL emission spectrum of complex **3** in MeCN solution and crystalline solid state

Figure S6. Benesi-Hildebrand plot of complex **1**

Figure S7. Job's plot of complex **1**

Figure S8. Fluorescence emission response of complex **1** against concentrations of fluoride ions

Figure S9. Fluorescence titration spectra(a) and UV-vis titration spectra (b) of complex **2**

Figure S10. UV-Vis spectral changes upon the addition of tetrabutylammonium fluoride ( $1.0 \times 10^{-3}$  M in MeCN) in  $\text{Snq}_2\text{Cl}_2$  ( $1.0 \times 10^{-5}$  M in MeCN).

Figure S11. Benesi-Hildebrand plot of  $\text{Snq}_2\text{Cl}_2$

Figure S12. Job's plot for complex  **$\text{Snq}_2\text{Cl}_2$** <sup>-</sup> fluoride interactions

Figure S13. Emission intensity changes of  $\text{Snq}_2\text{Cl}_2$  in the presence of anions (2 equiv) in MeCN

Figure S14. Optimized structure of  $\text{Snq}_2\text{Cl}_2$ ,  $\text{Sn}(\text{meq})_2\text{Cl}_2$ , and  $\text{Sn}(\text{dmqo})_2\text{Cl}_2$

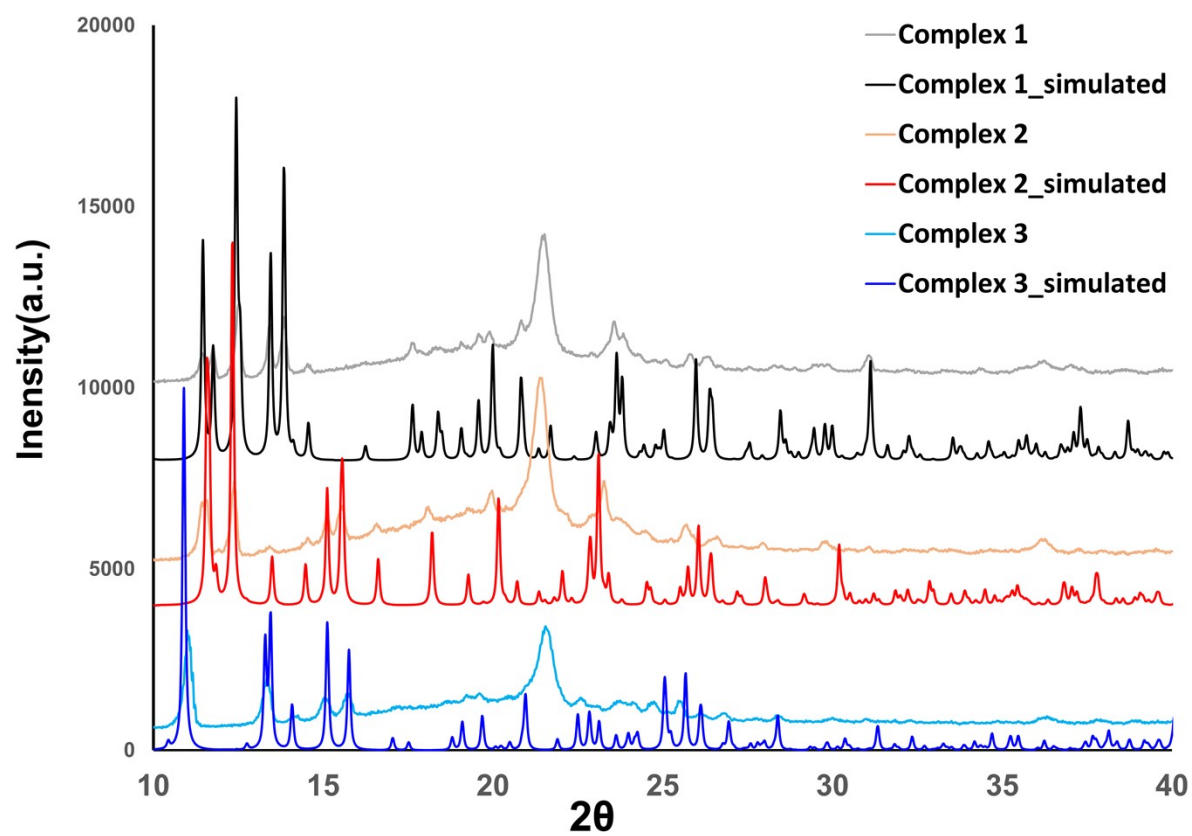

Fig. S1 Simulated and experimentally collected PXRD patterns for compounds **1-3**

| Complex <b>2</b>                                                                                               |                                                                                                                              | Complex <b>3</b>                                                                                                             |
|----------------------------------------------------------------------------------------------------------------|------------------------------------------------------------------------------------------------------------------------------|------------------------------------------------------------------------------------------------------------------------------|
| Crystal data                                                                                                   |                                                                                                                              |                                                                                                                              |
| Chemical formula                                                                                               | C <sub>20</sub> H <sub>16</sub> Cl <sub>0.67</sub> F <sub>1.33</sub> N <sub>2</sub> O <sub>2</sub> Sn                        | C <sub>20</sub> H <sub>16</sub> F <sub>2</sub> N <sub>2</sub> O <sub>2</sub> Sn                                              |
| <i>M<sub>r</sub></i>                                                                                           | 484.12                                                                                                                       | 473.04                                                                                                                       |
| Crystal system, space group                                                                                    | Monoclinic, <i>P</i> 2 <sub>1</sub> / <i>c</i>                                                                               | Triclinic, <i>P</i> 1                                                                                                        |
| Temperature (K)                                                                                                | 150                                                                                                                          | 150                                                                                                                          |
| <i>a</i> , <i>b</i> , <i>c</i> (Å)                                                                             | 13.7385 (4), 8.5689 (3), 15.9194 (5)                                                                                         | 7.7896 (5), 9.5538 (5), 13.4786 (8)                                                                                          |
| $\alpha$ , $\beta$ , $\gamma$ (°)                                                                              | 107.426 (1)                                                                                                                  | 70.205 (3), 75.540 (3), 66.973 (3)                                                                                           |
| <i>V</i> (Å <sup>3</sup> )                                                                                     | 1788.08 (10)                                                                                                                 | 860.61 (9)                                                                                                                   |
| <i>Z</i>                                                                                                       | 4                                                                                                                            | 2                                                                                                                            |
| Radiation type                                                                                                 | Cu <i>K</i> α                                                                                                                | Mo <i>K</i> α                                                                                                                |
| $\mu$ (mm <sup>-1</sup> )                                                                                      | 12.58                                                                                                                        | 1.52                                                                                                                         |
| Crystal size (mm)                                                                                              | 0.21 × 0.16 × 0.12                                                                                                           | 0.05 × 0.04 × 0.03                                                                                                           |
| Data collection                                                                                                |                                                                                                                              |                                                                                                                              |
| Diffractometer                                                                                                 | Bruker AXS D8 Quest                                                                                                          | Bruker AXS D8 Quest                                                                                                          |
| Absorption correction                                                                                          | Multi-scan<br><i>SADABS</i> 2016/2: Krause, L., Herbst-Irmer, R., Sheldrick G.M. & Stalke D., J. Appl. Cryst. 48 (2015) 3-10 | Multi-scan<br><i>SADABS</i> 2016/2: Krause, L., Herbst-Irmer, R., Sheldrick G.M. & Stalke D., J. Appl. Cryst. 48 (2015) 3-10 |
| <i>T<sub>min</sub></i> , <i>T<sub>max</sub></i>                                                                | 0.593, 0.754                                                                                                                 | 0.684, 0.747                                                                                                                 |
| No. of measured, independent and observed [ <i>I</i> > 2σ( <i>I</i> )] reflections                             | 52440, 3870, 3618                                                                                                            | 44029, 6561, 5697                                                                                                            |
| <i>R<sub>int</sub></i>                                                                                         | 0.063                                                                                                                        | 0.052                                                                                                                        |
| (sin $\theta$ /λ) <sub>max</sub> (Å <sup>-1</sup> )                                                            | 0.639                                                                                                                        | 0.771                                                                                                                        |
| Refinement                                                                                                     |                                                                                                                              |                                                                                                                              |
| <i>R</i> [ <i>F</i> <sup>2</sup> > 2σ( <i>F</i> <sup>2</sup> )], <i>wR</i> ( <i>F</i> <sup>2</sup> ), <i>S</i> | 0.041, 0.091, 1.20                                                                                                           | 0.030, 0.068, 1.07                                                                                                           |
| No. of reflections                                                                                             | 3870                                                                                                                         | 6561                                                                                                                         |
| No. of parameters                                                                                              | 256                                                                                                                          | 246                                                                                                                          |
| No. of restraints                                                                                              | 7                                                                                                                            | 0                                                                                                                            |
| H-atom treatment                                                                                               | H-atom parameters constrained                                                                                                | H-atom parameters constrained                                                                                                |
| Δρ <sub>max</sub> , Δρ <sub>min</sub> (e Å <sup>-3</sup> )                                                     | 0.82, -1.43                                                                                                                  | 1.57, -0.88                                                                                                                  |

Table S1. Crystallographic details and information for compounds **2** and **3**

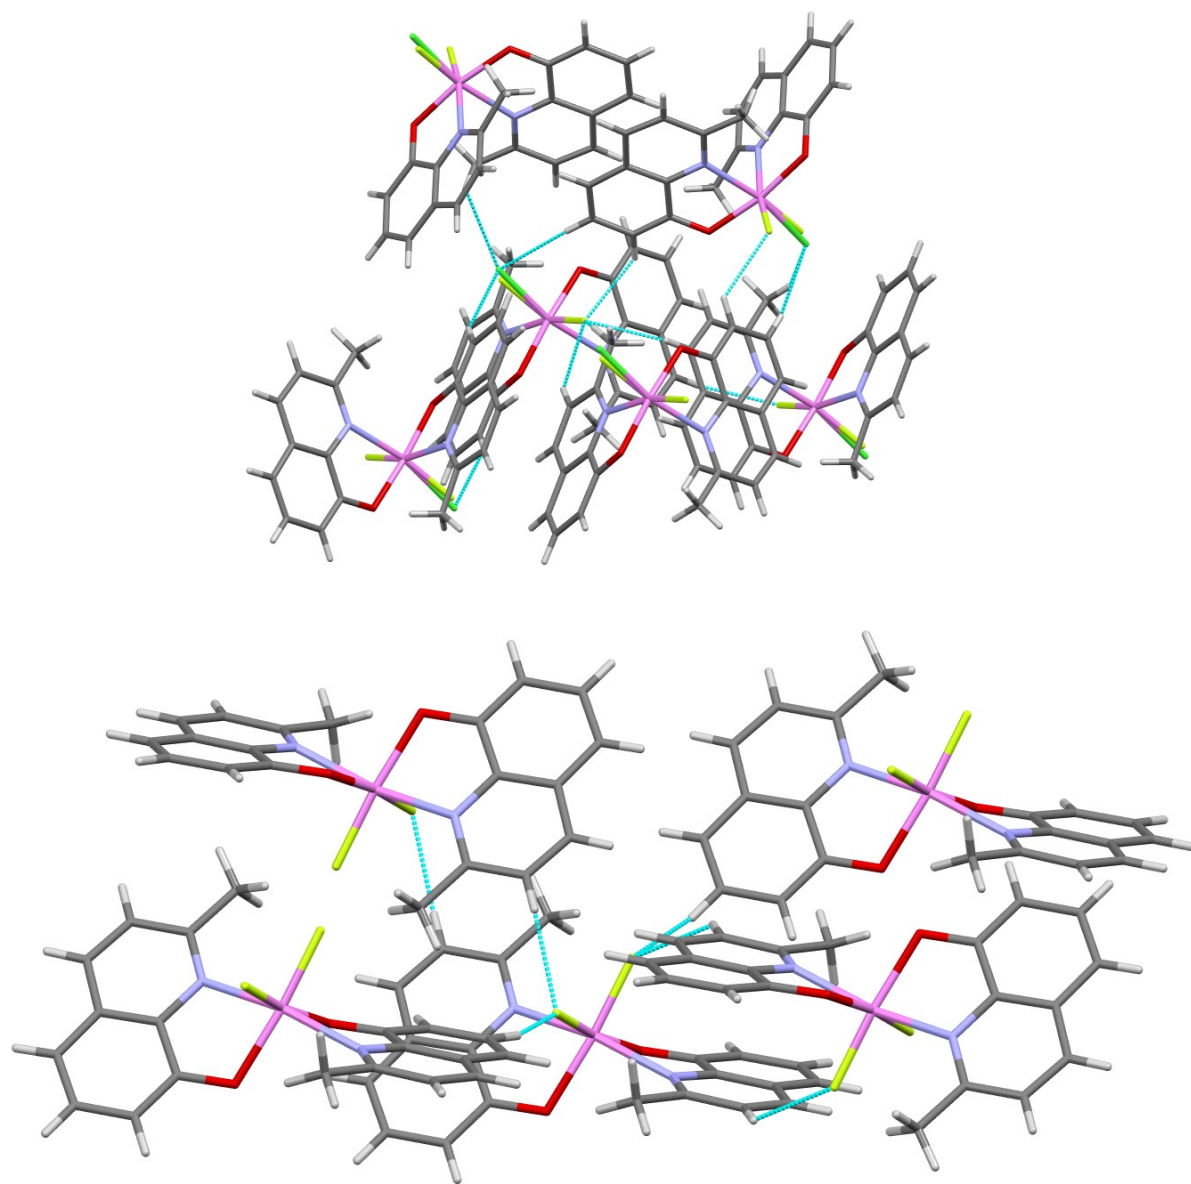

Figure S2. Depictions of the hydrogen interactions with the halide moieties within complex **2** (top) and complex **3** (bottom). Interactions are shown as blue dotted lines.

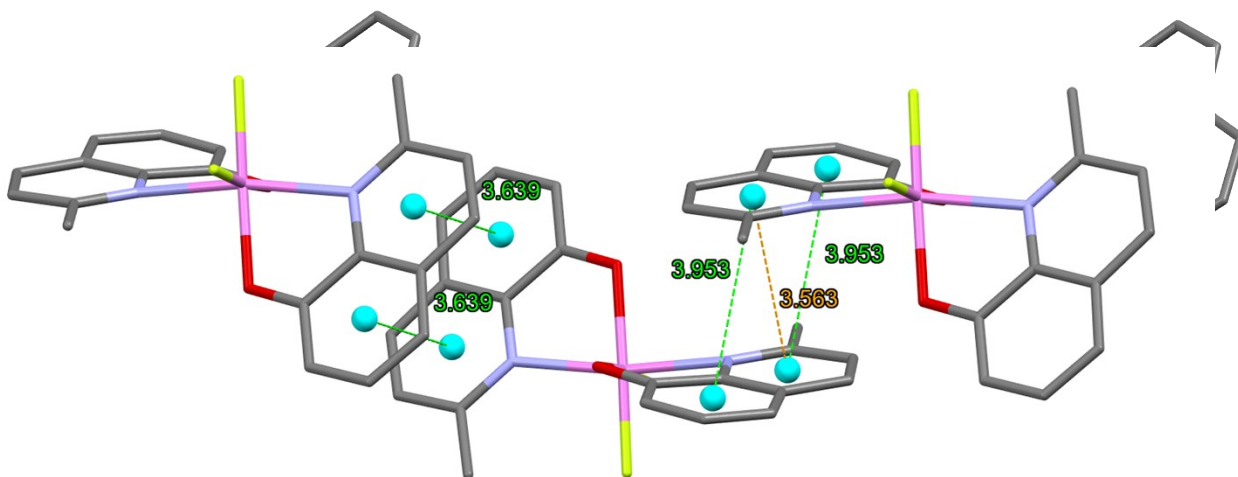

Figure S3. Depictions of the  $\pi$  stacking interactions with the halide moieties within complex **2** (top) and complex **3** (bottom).

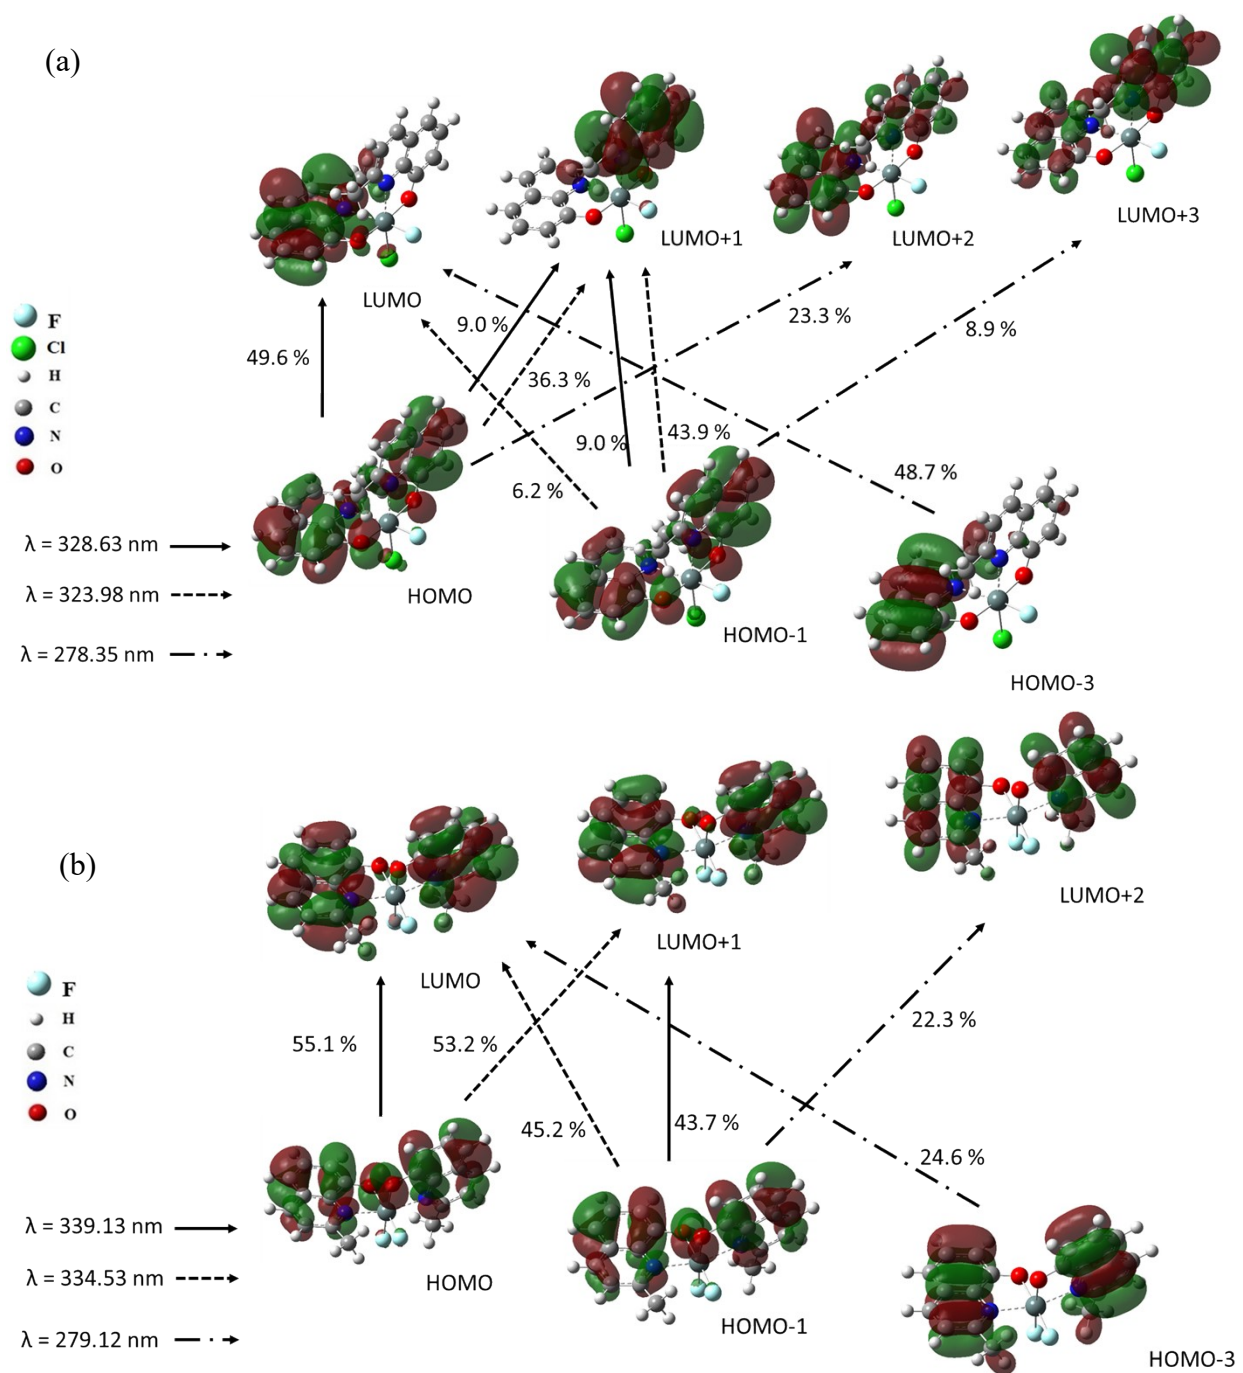

Figure S4. Calculated MO surfaces for complex **2** (a) and complex **3** (b)

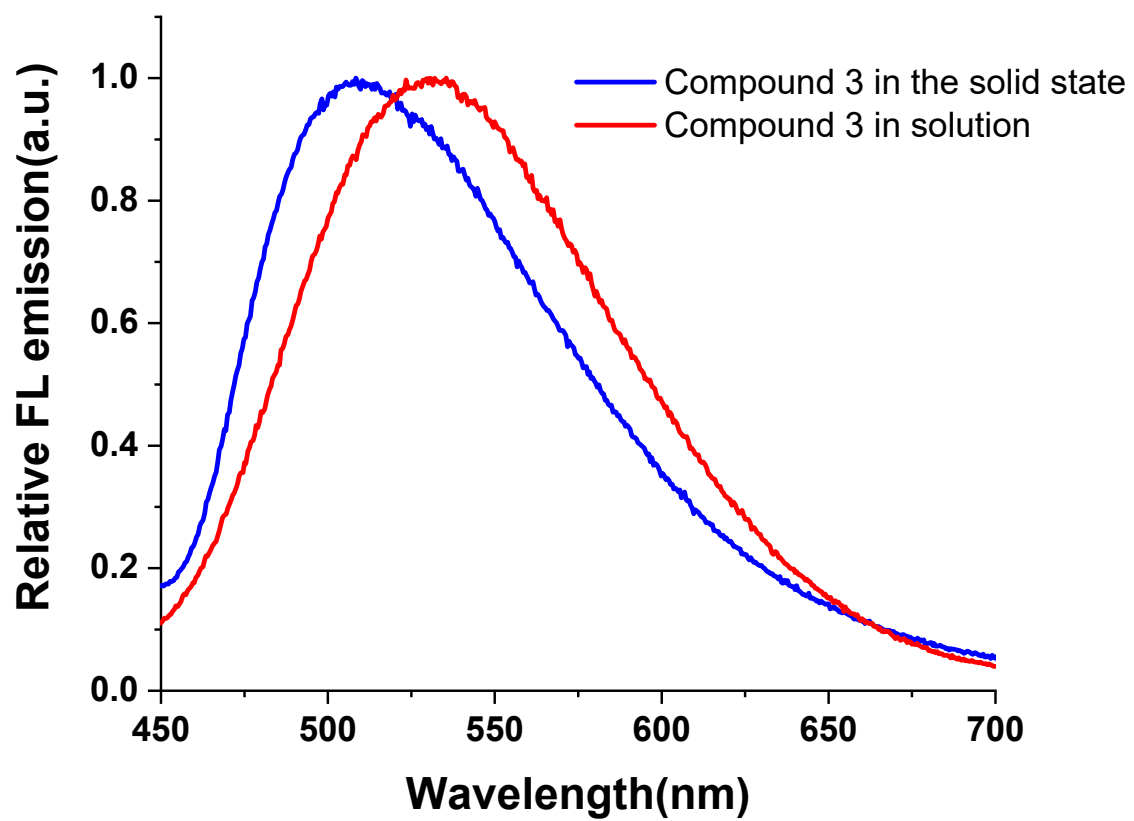

Figure S5. FL spectra of complex **3** in MeCN solution and crystalline solid state ( $\lambda_{\text{ex}}=360\text{nm}$ )

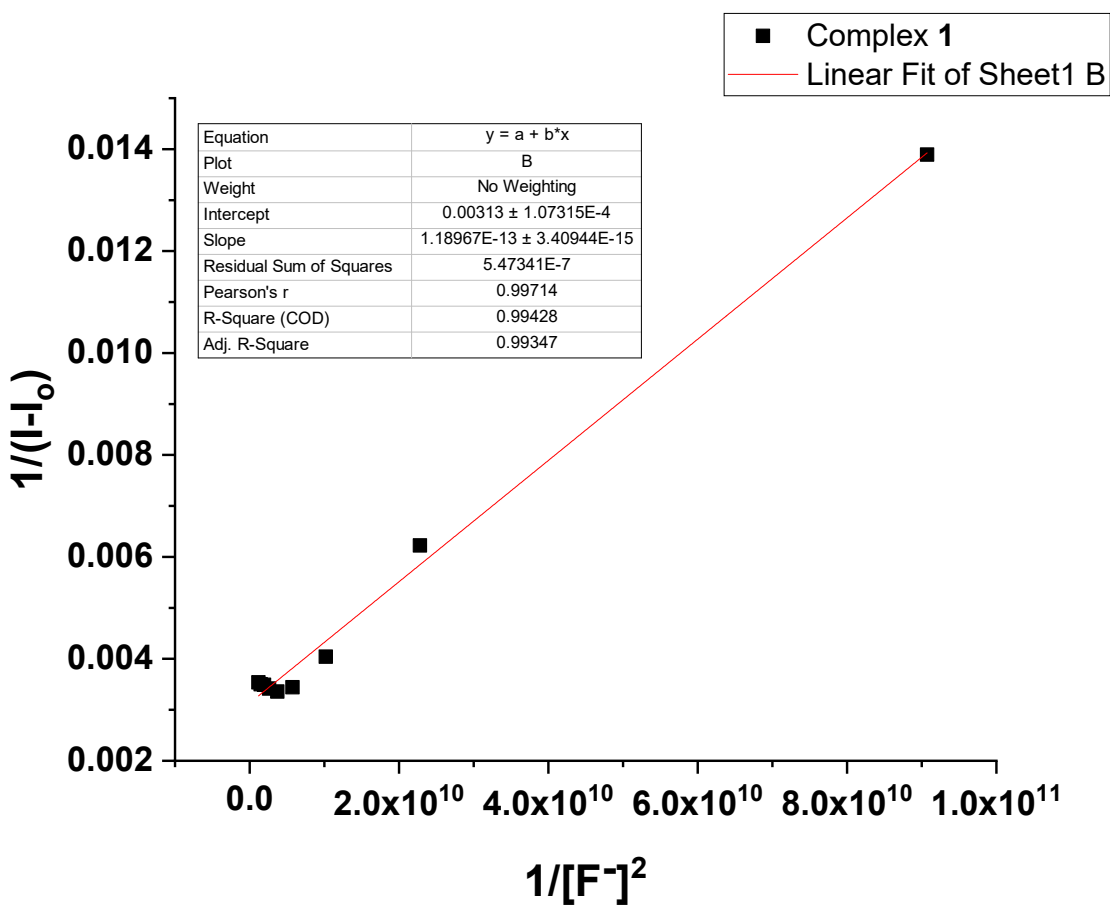

Figure S6. Benesi-Hildebrand plot using 1:2 stoichiometry (complex **1** and fluoride) for binding constant between complex **1** and fluoride ion. Benesi-Hilderbrand equations is used by

$$\frac{1}{I - I_o} = \frac{1}{I' - I_o} + \frac{1}{(I' - I_o)K[F^-]^2}$$
 where  $I_o$  is FL intensity in the absence of  $F^-$ ,  $I$  is FL intensity at various concentration of  $F^-$  and  $I'$  is the max intensity in the presence of  $F^-$  ions.

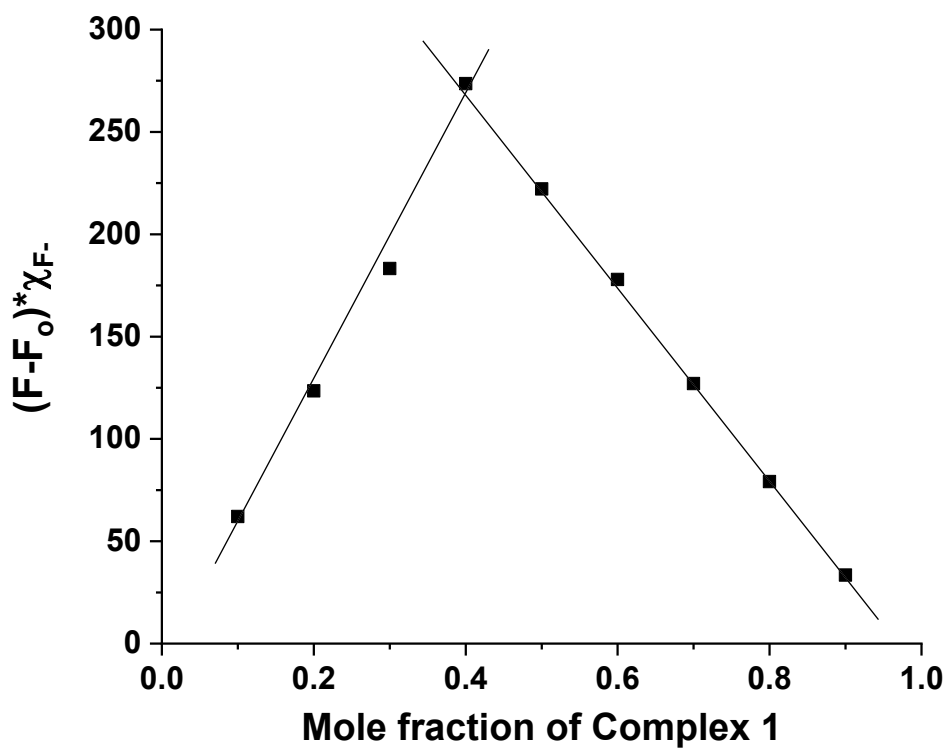

Figure S7. Job's plot for the determination of the stoichiometry of complex 1 and  $F^-$  in the MeCN.

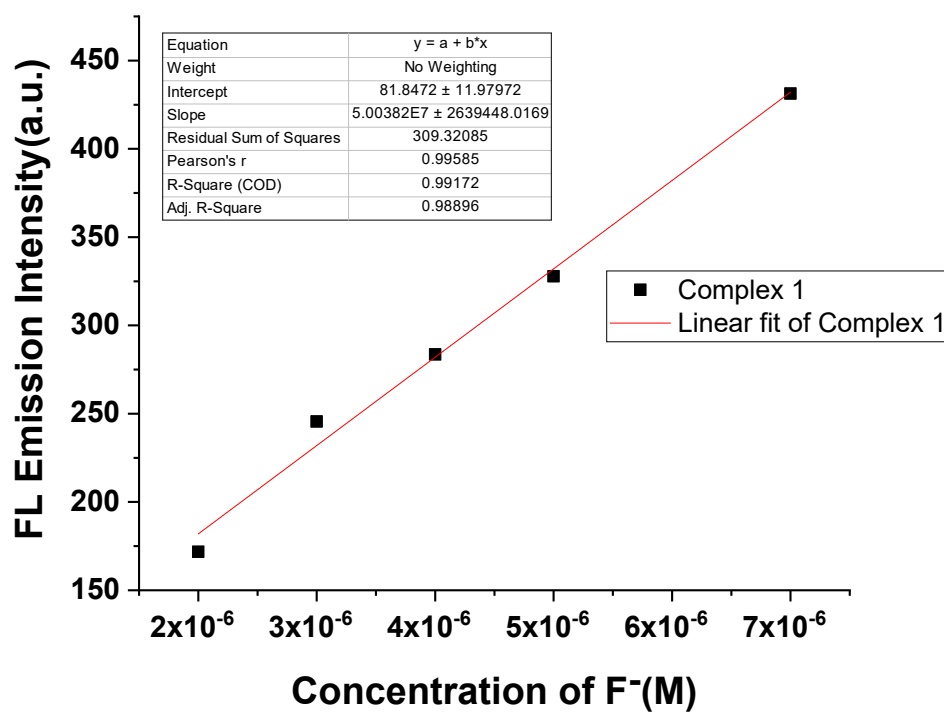

Figure S8. Fluorescence emission response of complex **1** against concentrations of fluoride ions to determine the limit of detection (LOD) obtained from the  $3\sigma/m$  ( $\sigma$ : the standard deviation of blank emission of complex **1** and  $m$ : the slope of calibration curve)

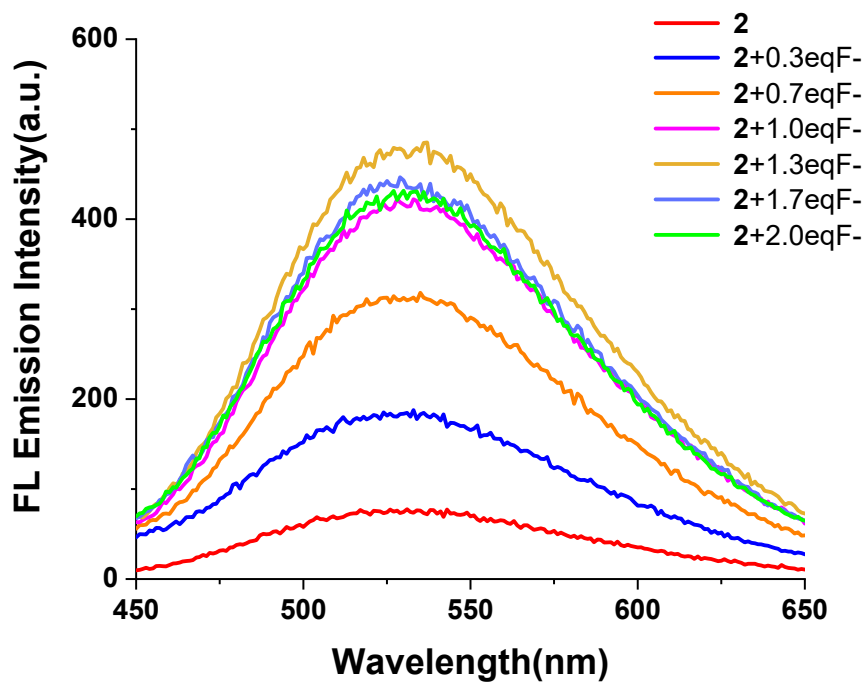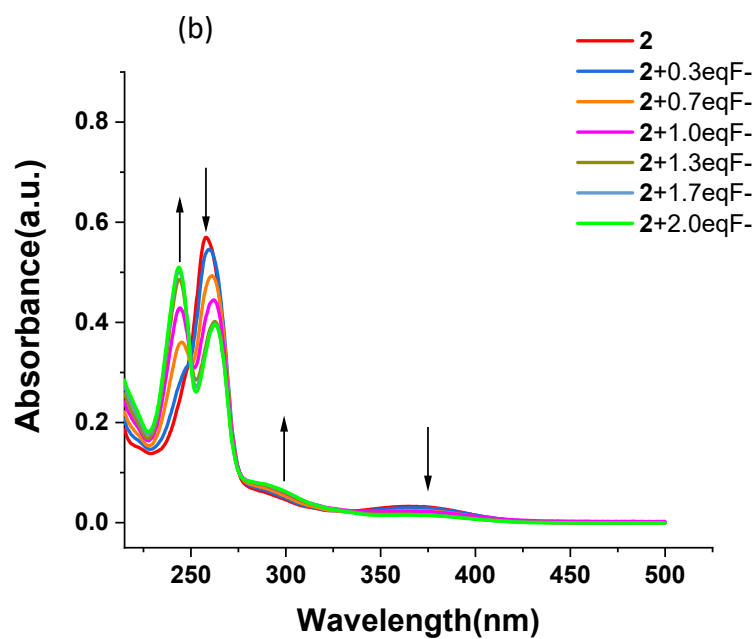

Figure S9. Fluorescence titration spectra(a) and UV-vis titration spectra (b) of complex **2** in MeCN solution upon the addition of  $F^-$  from 0 to 2.0 eqv of  $F^-$

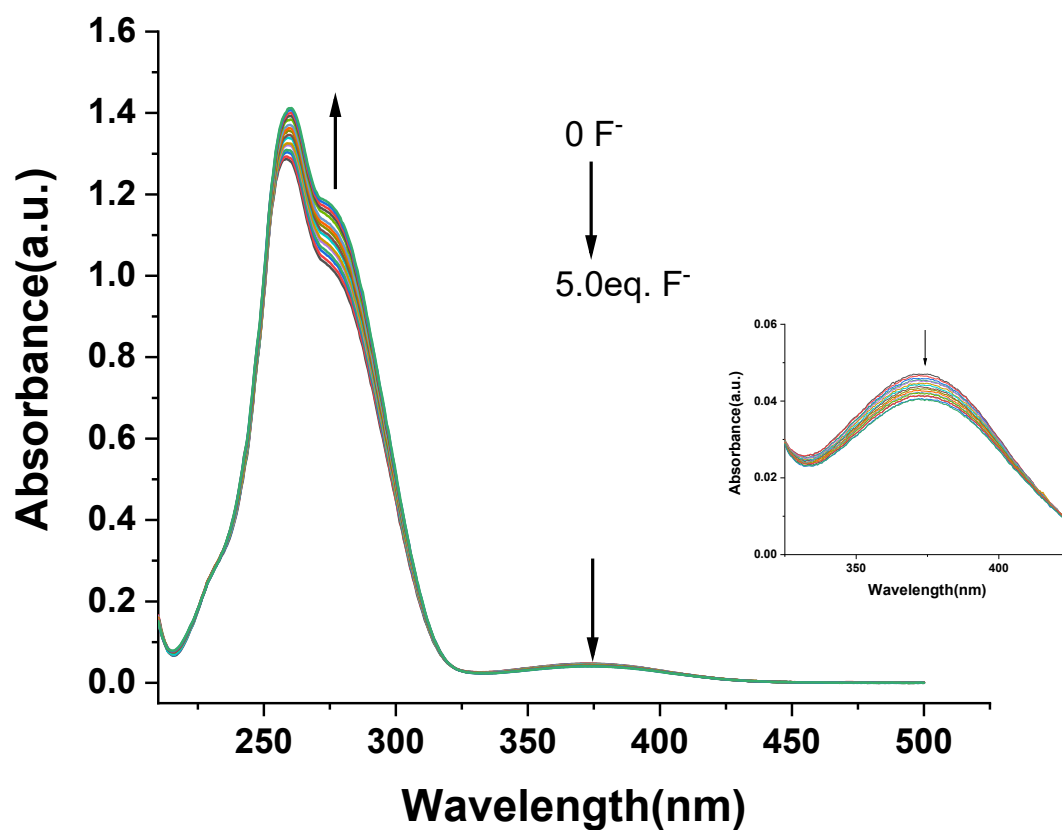

Figure S10. UV-Vis spectral changes upon the addition of tetrabutylammonium fluoride ( $1.0 \times 10^{-3}$  M in MeCN) in  $Snq_2Cl_2$  ( $1.0 \times 10^{-5}$  M in MeCN). Inset shows UV-Vis spectral changes at 375 nm

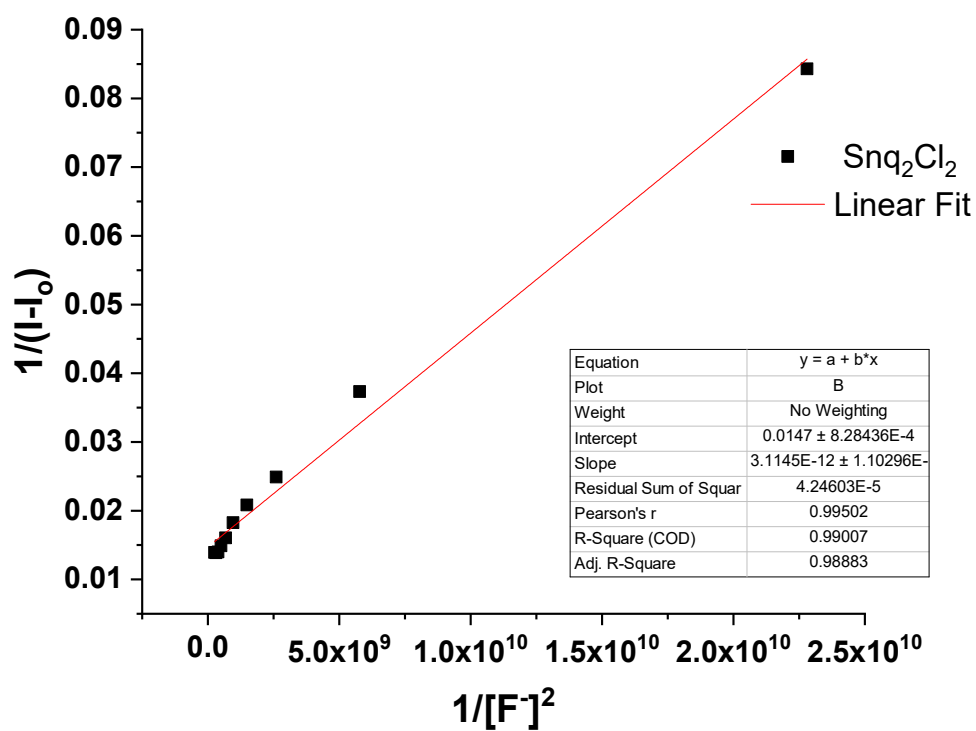

Figure S11. Benesi-Hildebrand plot using 1:2 stoichiometry( $\text{Snq}_2\text{Cl}_2$  and fluoride) for binding constant between  $\text{Snq}_2\text{Cl}_2$  and fluoride ion.

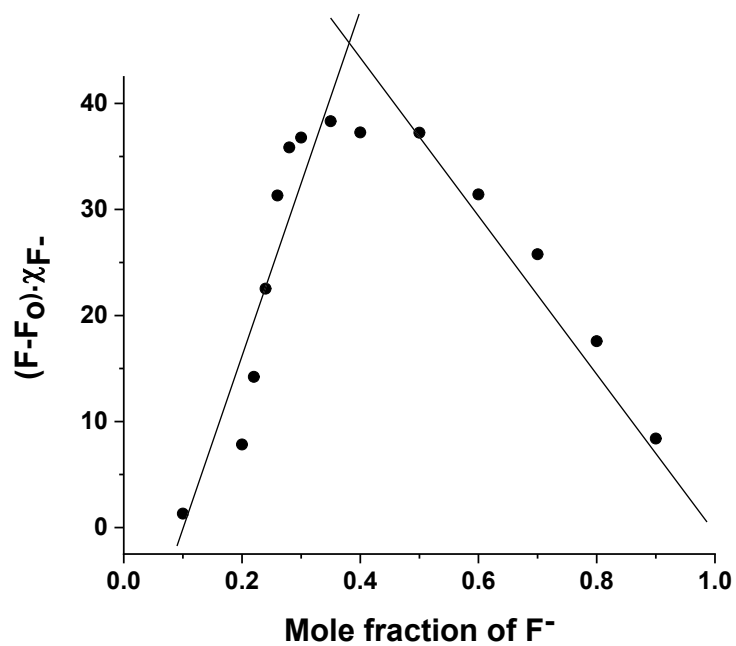

Figure S12. Job's plot for complex  $\text{Snq}_2\text{Cl}_2$ -fluoride interactions

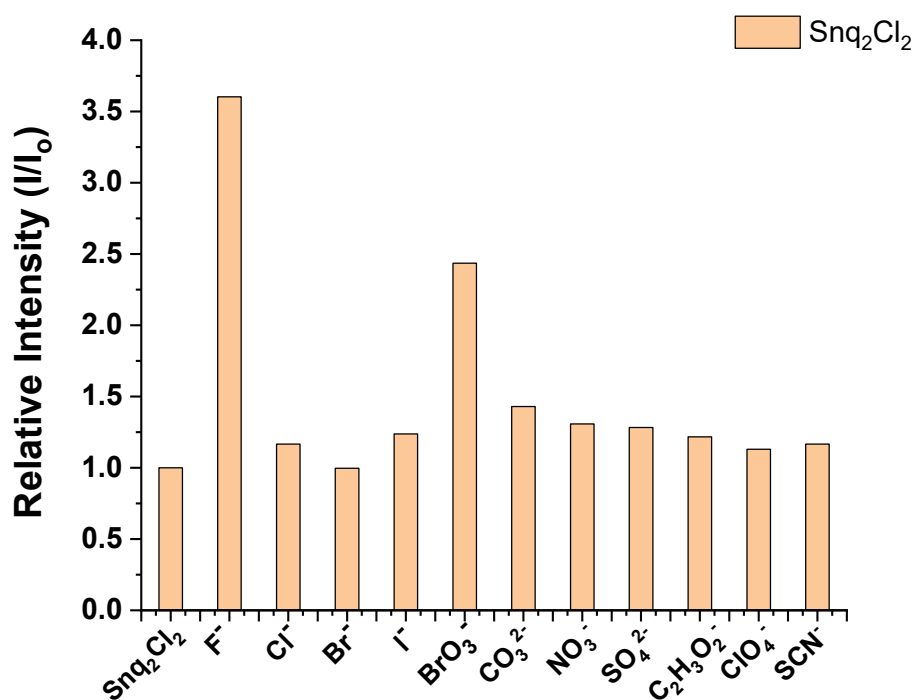

Figure S13. Emission intensity changes of  $\text{Snq}_2\text{Cl}_2$  in the presence of anions (2 equiv) in MeCN. Bars represent the ratio of emission intensity ( $I/I_0$ ),  $I_0$  is the emission intensity of  $\text{Snq}_2\text{Cl}_2$  without anions at 530 nm.

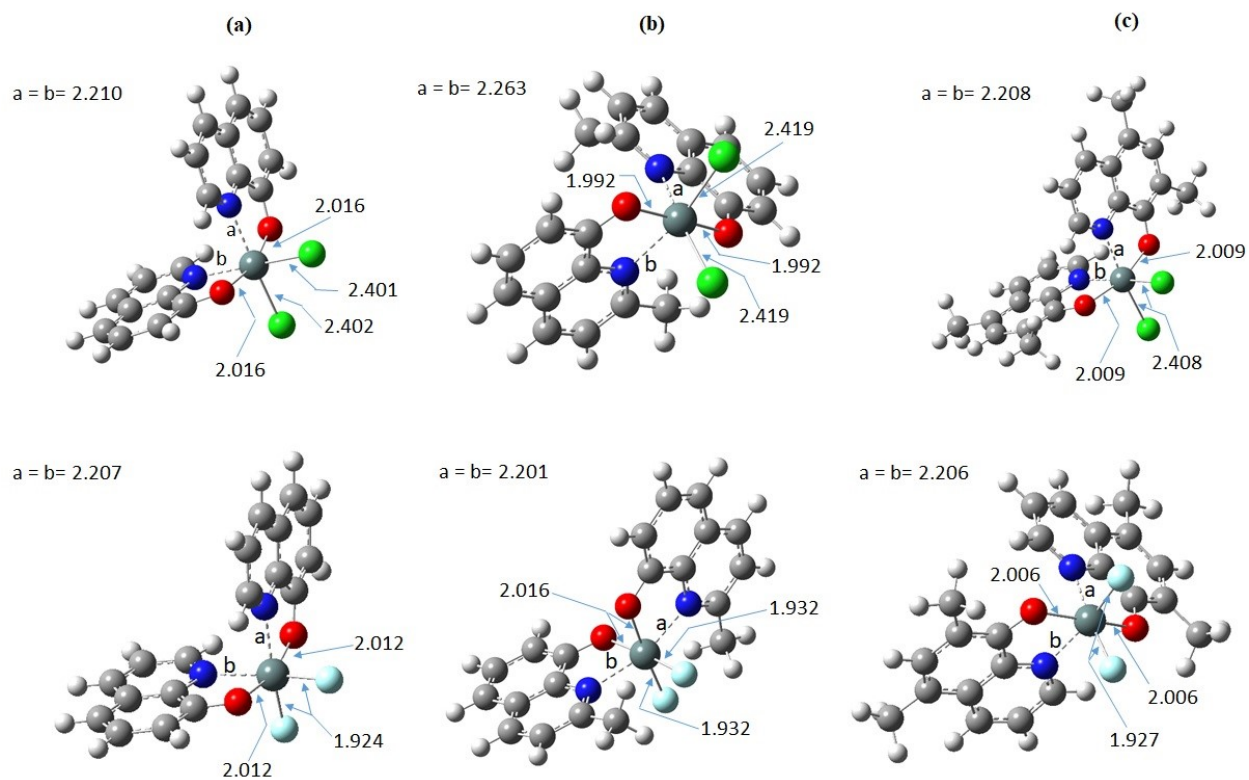

Figure S14. Optimized structure of  $\text{Snq}_2\text{Cl}_2$ ,  $\text{Sn}(\text{meq})_2\text{Cl}_2$ ,  $\text{Sn}(\text{dmqq})_2\text{Cl}_2$  and their respective fluorinated derivatives.
